# Supplementary material for: Effect of Electron Donating Functional Groups on Corrosion Inhibition of J55 Steel in a Sweet Corrosive Environment: Experimental, Density Functional Theory, and Molecular Dynamic Simulation
Source: MDPI journal article supplement (doi:10.3390/ma12010017), 2018-12-21
Supplement: s1 [file s1]

# Supplementary Materials: Effect of Electron Donating Functional Groups on Corrosion Inhibition of J55 Steel in a Sweet Corrosive Environment: Experimental, Density Functional Theory, and Molecular Dynamic Simulation

Ambrish Singh, Kashif R. Ansari, Mumtaz A. Quraishi and Hassane Lgaz

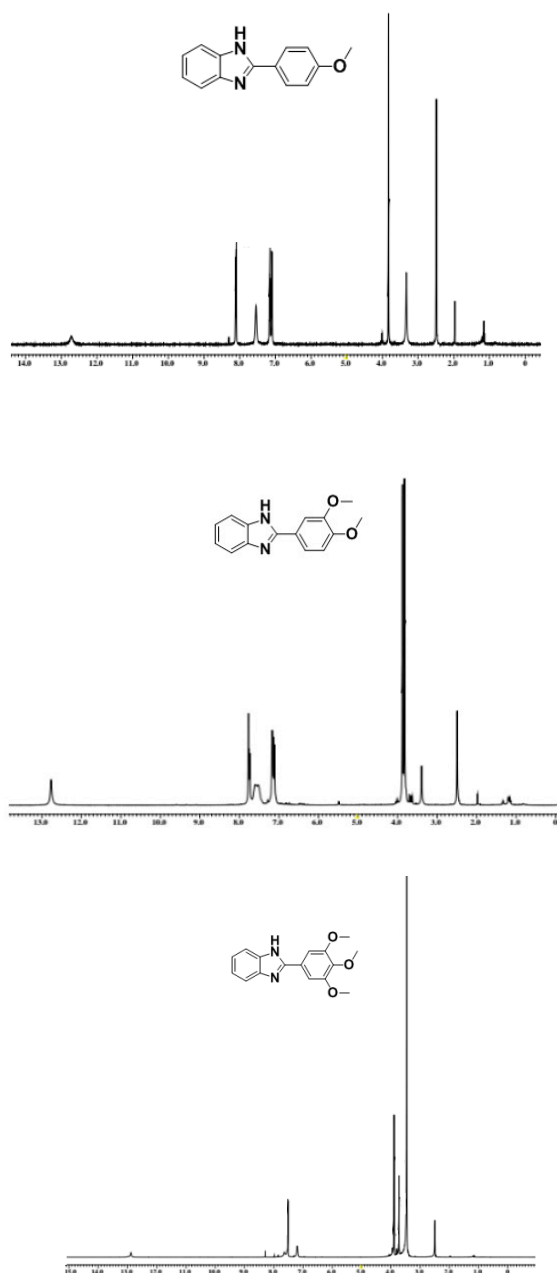

Figure S1. <sup>1</sup>H NMR spectra.

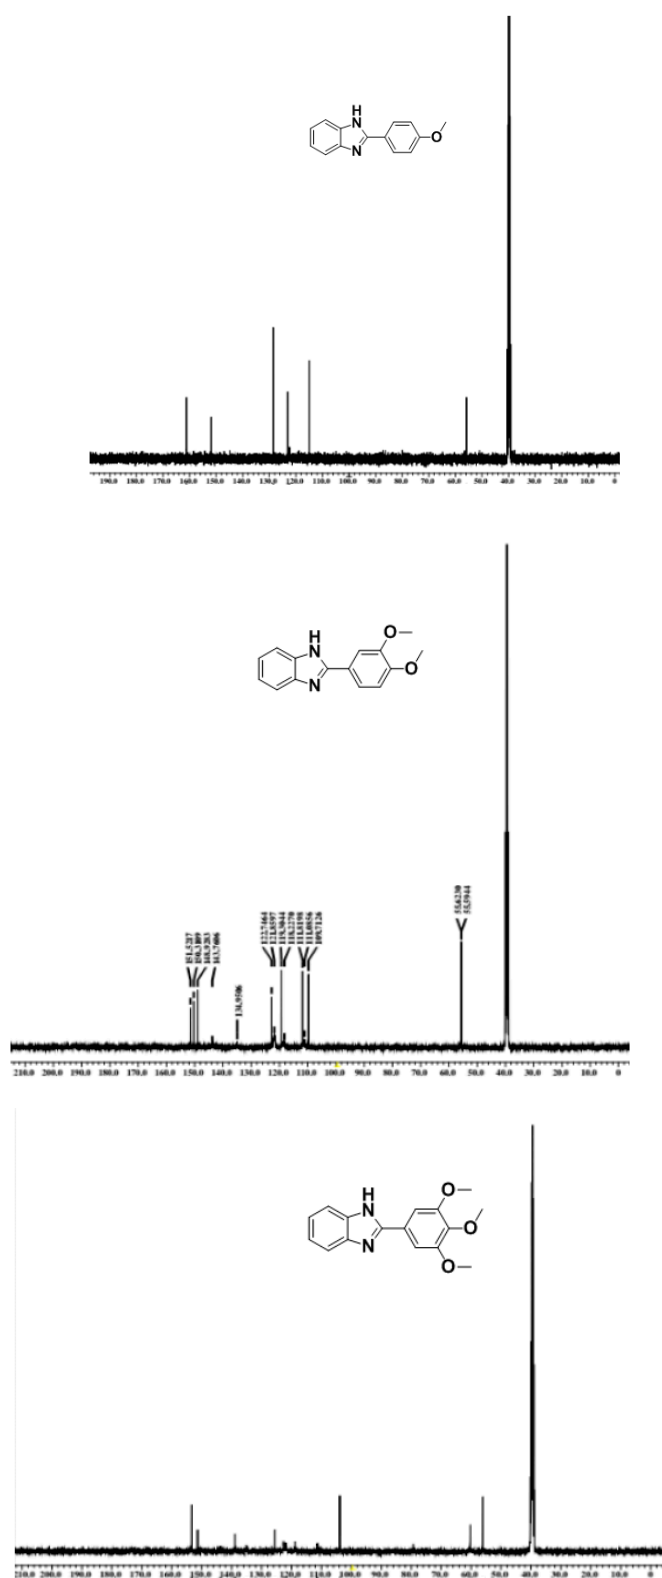Figure S2.  $^{13}\text{C}$  NMR spectra.

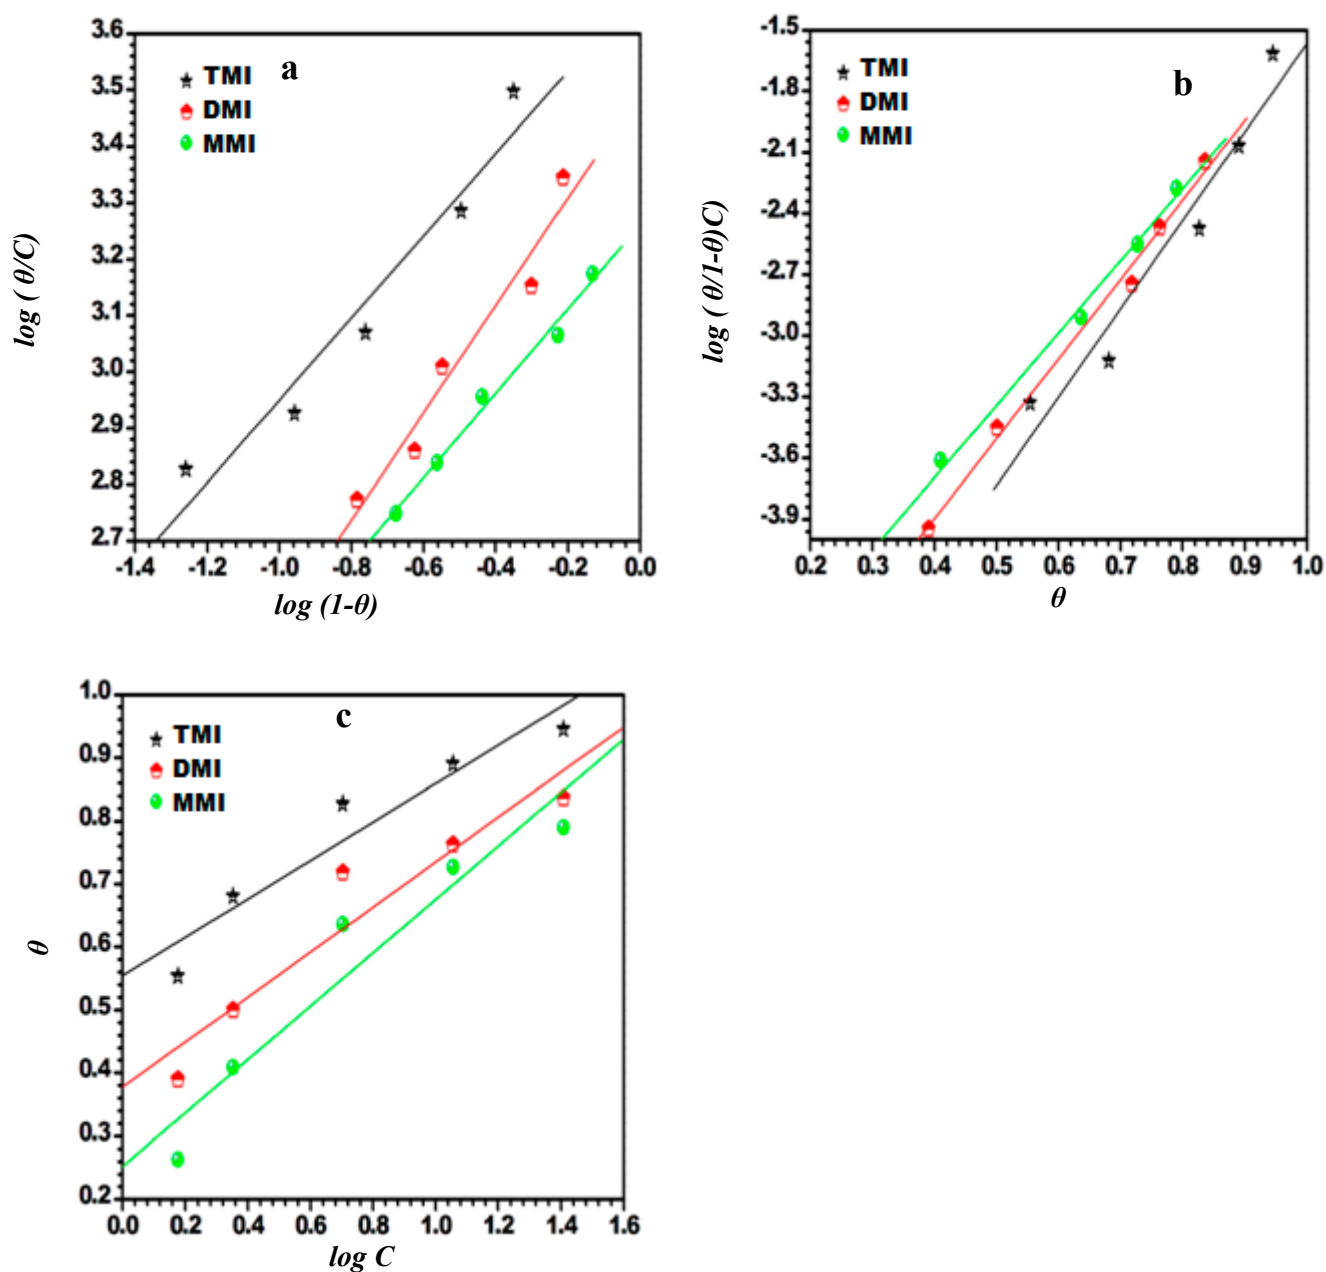

Figure S3. Adsorption isotherm plots: (a) Flory-Huggins, (b) Frumkin, (c) Temkin.

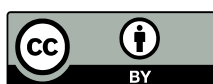

© 2018 by the authors. Licensee MDPI, Basel, Switzerland. This article is an open access article distributed under the terms and conditions of the Creative Commons Attribution (CC BY) license (<http://creativecommons.org/licenses/by/4.0/>).
